# Supplementary material for: Two AIEE-active α-cyanostilbene derivatives containing BF2 unit for detecting explosive picric acid in aqueous medium
Source: Royal Society of Chemistry journal article supplement (doi:10.1039/c9ra05116c), 2019-01-01
Supplement: c9ra05116c1.pdf [file c9ra05116c1.pdf]

## *Support information for*

### **Two AIEE-active $\alpha$ -cyanostilbene derivatives containing $\text{BF}_2$ unit for detecting explosive picric acid in aqueous medium**

Shengmei Guo<sup>a</sup>, Jingting Pan<sup>a,b</sup>, Jianyan Huang<sup>a</sup>, Lin Kong<sup>a</sup>, Jiayang Yang<sup>\*a</sup>

#### Contents:

1. Photophysical data in different polar solvents.
2. UV-Vis spectra (A) and fluorescence spectra (B) of the compound **TPA-B** in different solvents.
3. Lippert-Mataga diagram of compounds **TPA-B** and **TPA-BN**.
4. UV-Vis spectra of **TPA-B** (a) and **TPA-BN** (b) in THF/H<sub>2</sub>O mixtures.
5. PL emission (a) spectra changes of **TPA-B** in THF/H<sub>2</sub>O mixtures.
6. Photophysical properties of PA detection for compound **TPA-BN**.
7. UV-vis absorption spectra of PA and Normalized Fluorescence of **TPA-B** and **TPA-BN**
8. Performance comparison of organoboron chemosensors reported for PA.

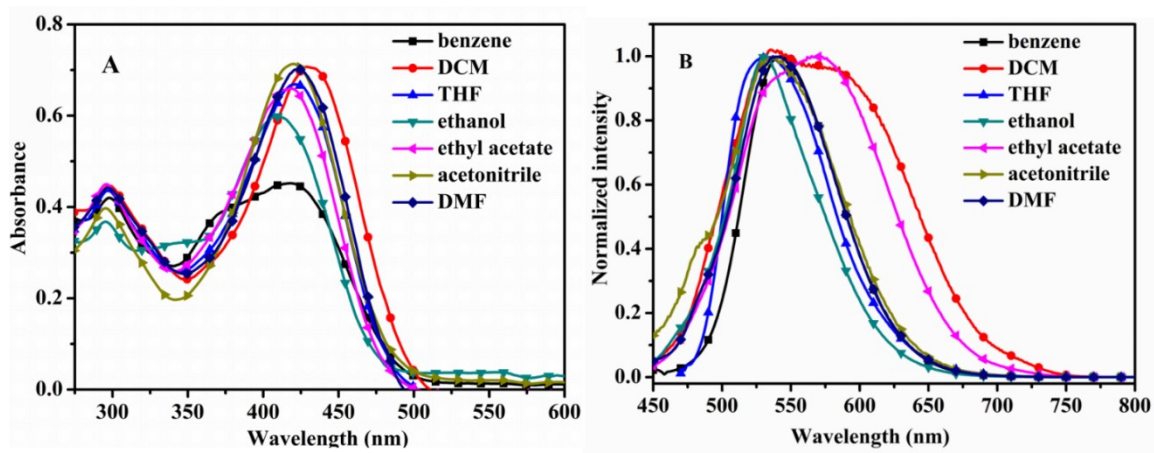

Fig. S1. UV-Vis spectra (A) and fluorescence spectra (B) of the compound **TPA-B** in different solvents.

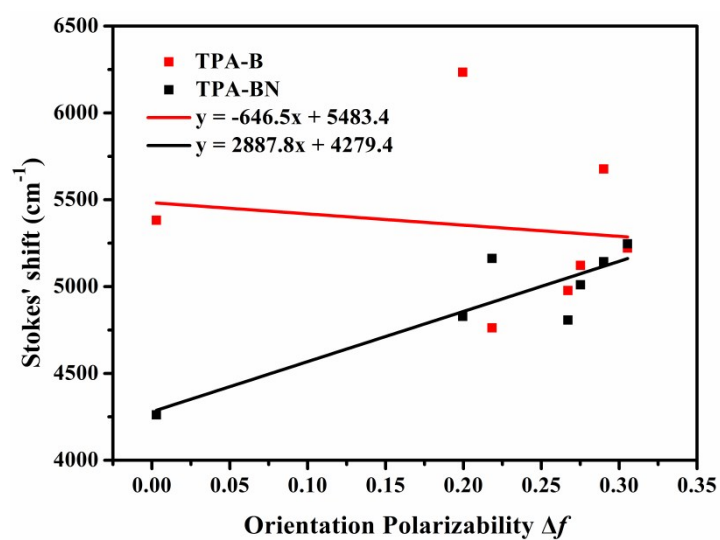

Fig. S2. Lippert-Mataga diagram of compounds **TPA-B** and **TPA-BN**.

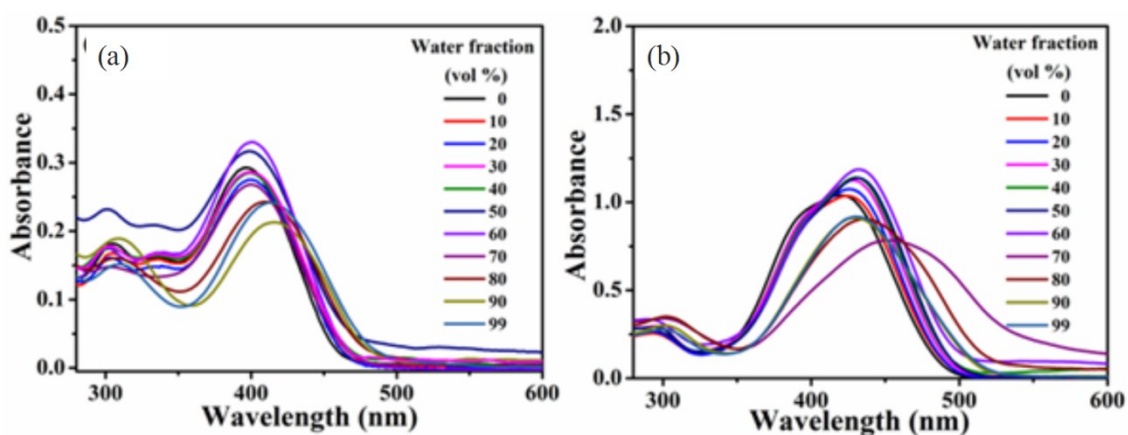

Fig. S3 UV-Vis spectra of **TPA-B** (a) and **TPA-BN** (b) in THF/water mixtures with different water volume fractions.

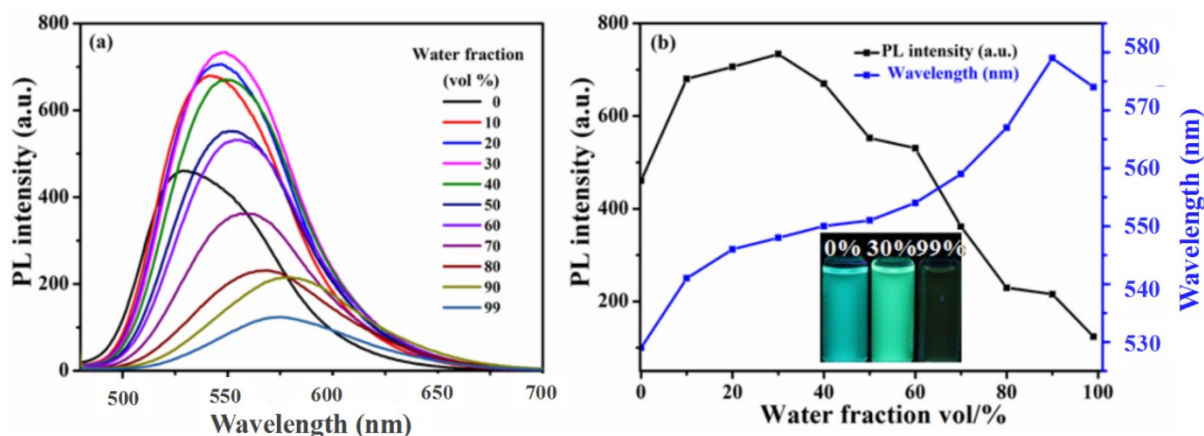

Fig. S4. PL emission (a) spectra changes of **TPA-B** ( $5.0 \times 10^{-5}$  M) in THF/ H<sub>2</sub>O mixtures with different water volume fractions; Plots of fluorescence intensity determined in THF-H<sub>2</sub>O solutions versus water fractions (b). Insets: photos of **TPA-B** in THF-H<sub>2</sub>O mixtures ( $f_w = 0\%$ , 30% and 99%) taken under 365 nm UV lamp.

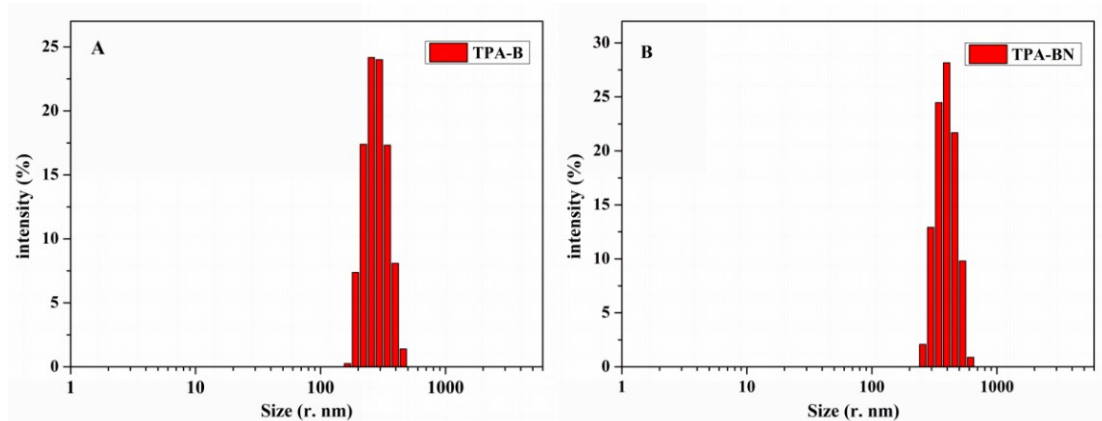

Fig. S5 The particle size analysis of **TPA-B** (A) in THF- H<sub>2</sub>O mixtures ( $f_w = 30\%$ ) and **TPA-BN** (B) in THF- H<sub>2</sub>O mixtures ( $f_w = 80\%$ ).

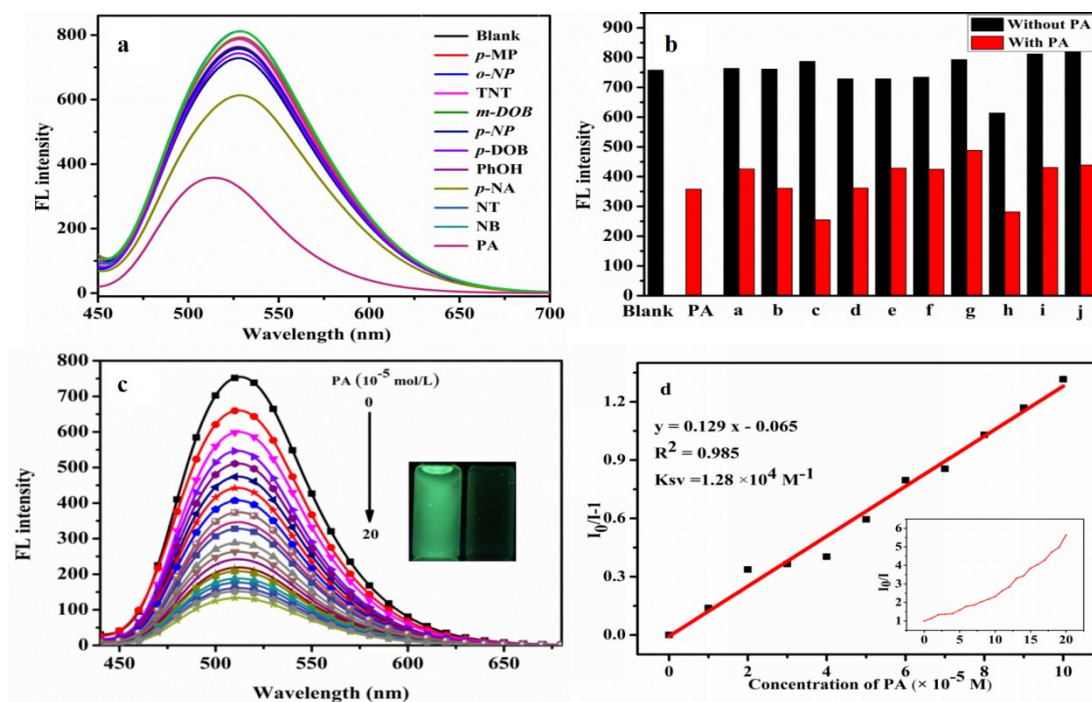

Fig. S6 (a) FL emission spectra obtained for different analytes (100 ppm); (b) quenching percentages of compound TPA-B (10 mM) with different analytes (100 ppm) in THF/water (v/v=2:8) mixtures before (black) and after (red) the addition of 100 ppm. a: *p*-MP, b: *o*-NP, c: TNT, d: *m*-DOB, e: *p*-NP, f: *p*-DOB, g: PhOH, h: *p*-NA, i: NT, j: NB; (c) FL spectra of TPA-B in THF/water (v/v = 7 : 3) containing different amounts of PA; (d) corresponding Stern-Volmer plot for PA detection. Inset: Stern-Volmer plot obtained at a lower concentration of PA.

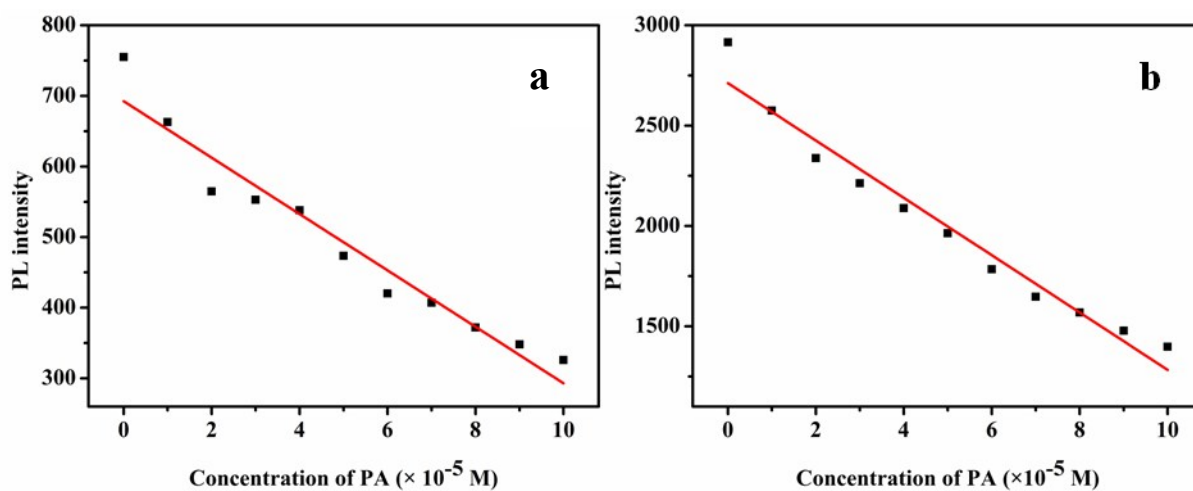

Fig. S7 The linear relationship of TPA-B (a) and TPA-BN (b) between the fluorescence intensity and the PA concentration

Table S1 Performance comparison of organoboron chemosensors reported for PA

| Compounds                                                                                                      | Detecting system              | $K_{sv}/M^{-1}$                            | Limit of detection (LOD)                         | Ref.      |
|----------------------------------------------------------------------------------------------------------------|-------------------------------|--------------------------------------------|--------------------------------------------------|-----------|
| 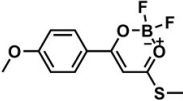                              | Pure DCM solution             | $0.5 \times 10^4$                          | $21.5 \times 10^{-6}$                            | [58]      |
|                               | test paper (toluene solution) | $2.1 \times 10^6$                          | $49.8 \times 10^{-9}$                            | [56]      |
|                               | In $CH_3CN/H_2O$ solution     | $9.2 \times 10^6$                          | $35.8 \times 10^{-8}$                            | [59]      |
| <br>$R = NMe_2$<br>$= NPh_2$ | Pure THF solution             | $0.7 \times 10^4 /$<br>$1.0 \times 10^4$   | /                                                | [57]      |
| <b>TPA-BN/TPA-B</b>                                                                                            | THF/ $H_2O$ mixtures          | $1.28 \times 10^4 /$<br>$1.07 \times 10^4$ | $1.26 \times 10^{-6} /$<br>$1.51 \times 10^{-6}$ | This work |

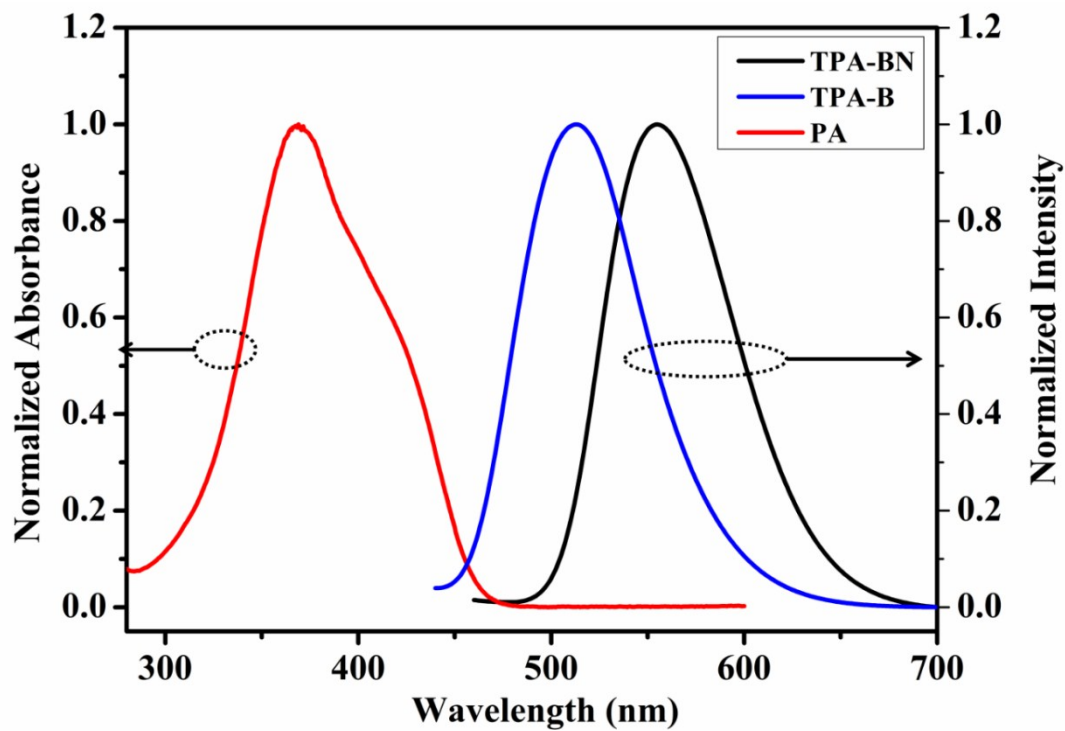

**Fig. S8.** UV-vis absorption spectra of PA; Normalized Fluorescence of TPA-B and TPA-BN.
